# Supplementary material for: Cancer-Associated Fibroblasts and Squamous Epithelial Cells Constitute a Unique Microenvironment in a Mouse Model of Inflammation-Induced Colon Cancer
Source: PubMed Central journal article supplement (PMC9114773; doi:10.3389/fonc.2022.878920), 2022-05-04
Supplement: Image_2.pdf [file Image_2.pdf]

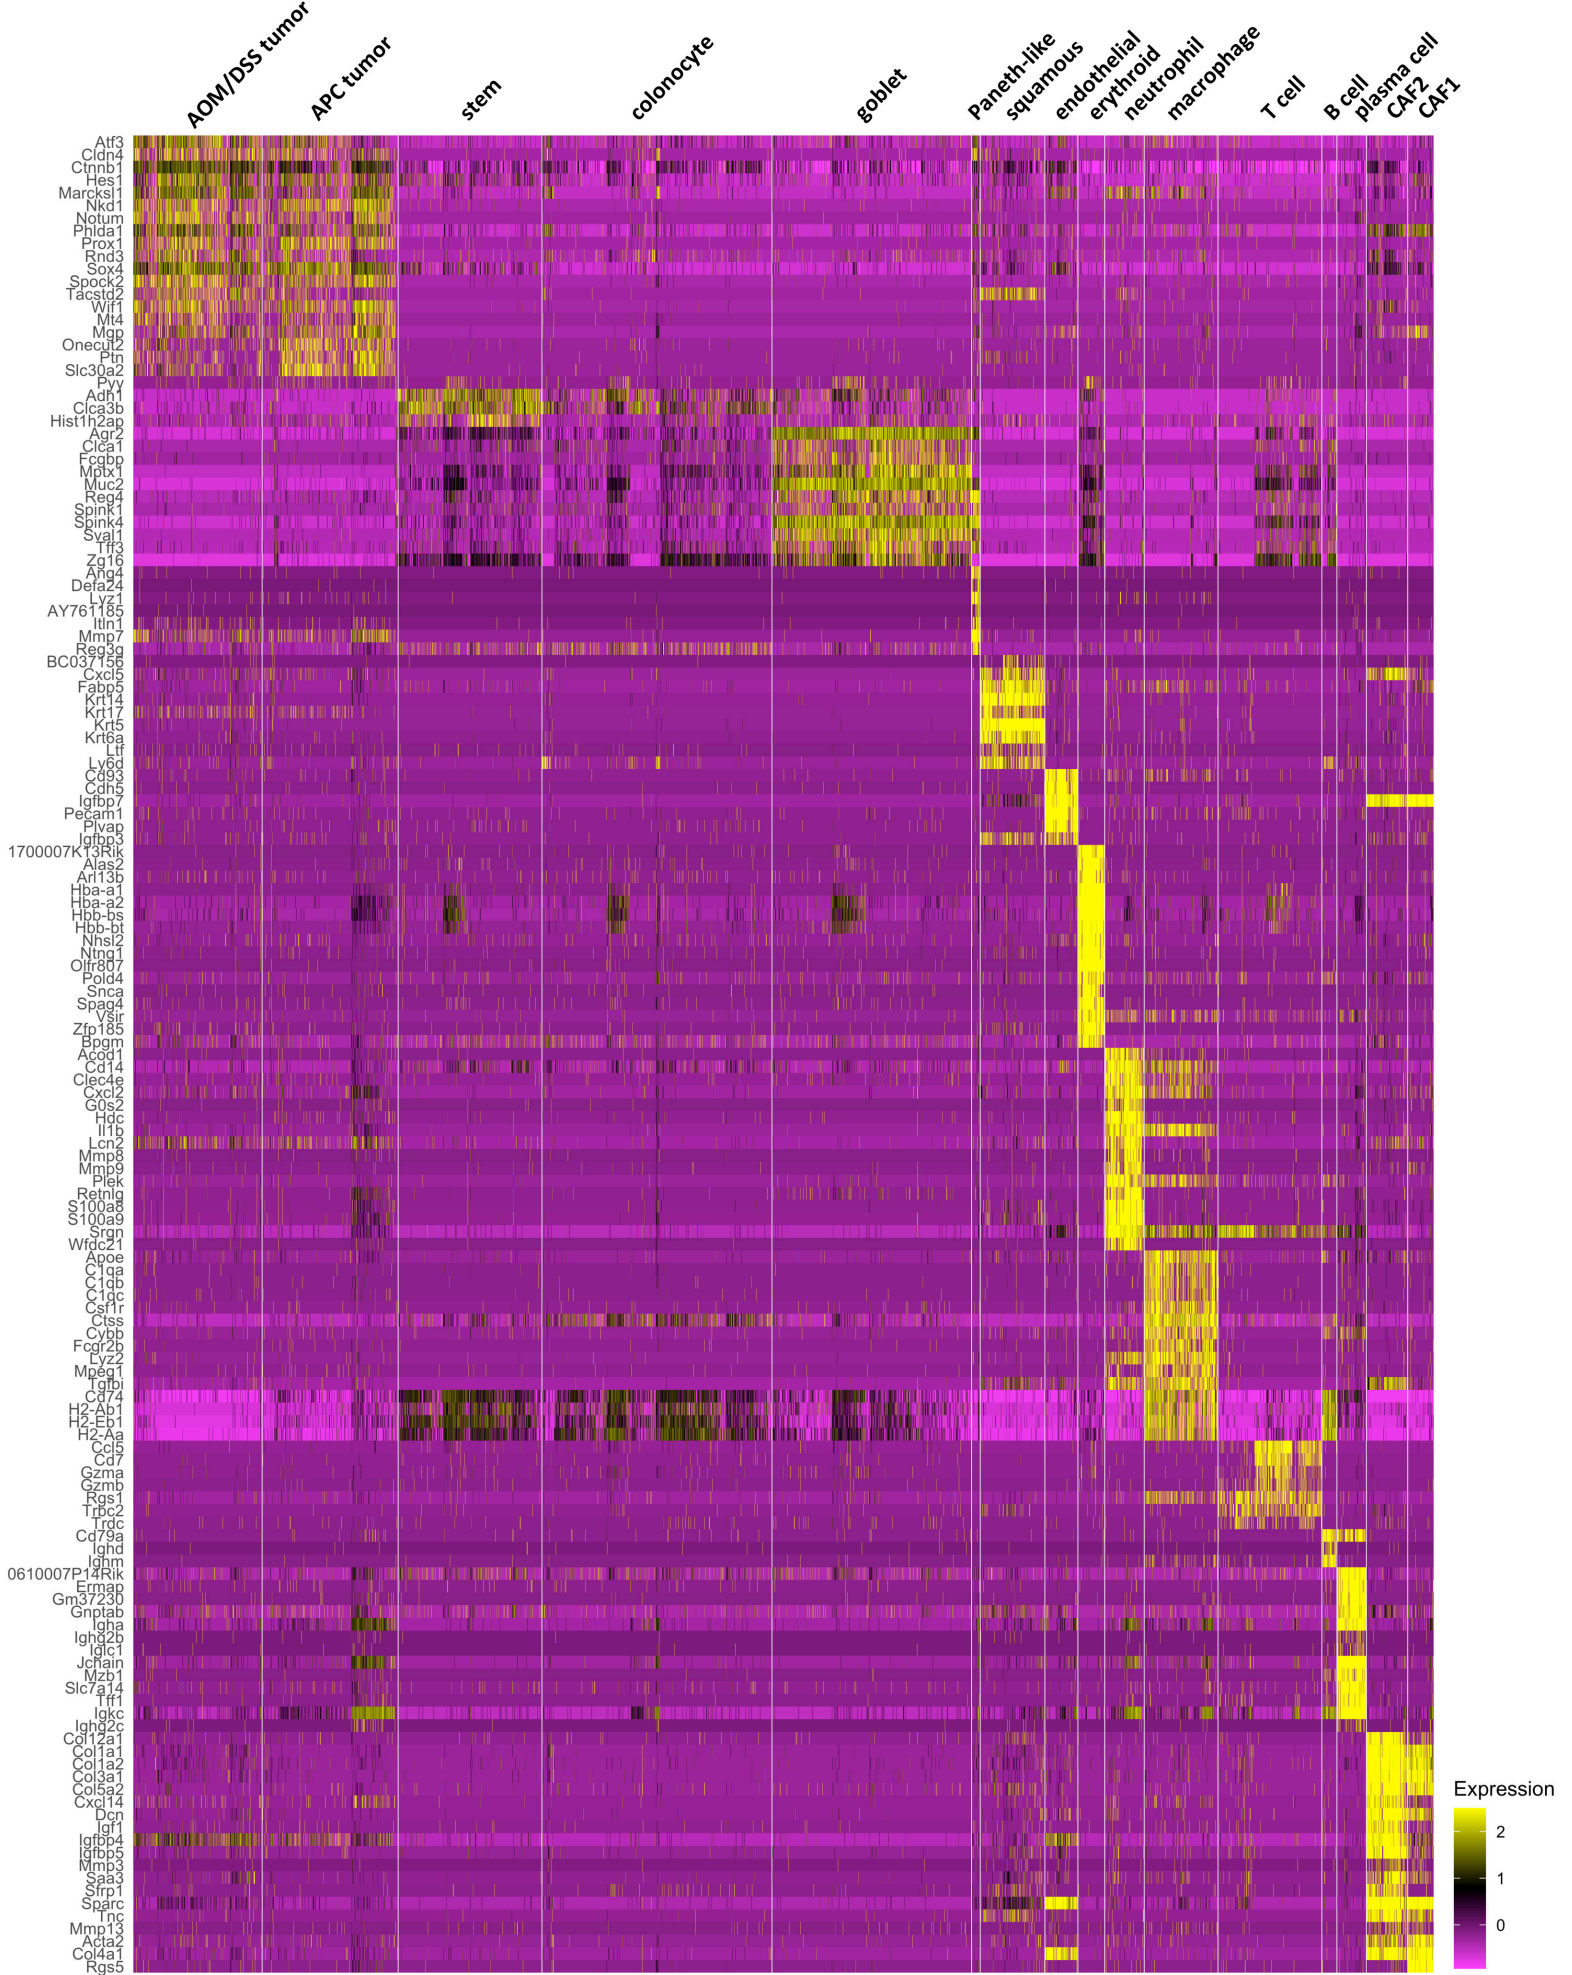

**Supplementary Figure S2 | Heatmap displaying top differentially expressed genes in all clusters in scRNA-seq data from normal colonic, APC tumor, and AOM/DSS tumor samples. Rows correspond to individual genes and columns are individual cells, arranged by epithelial cell type clusters.**
