# Supplementary material for: Cancer-Associated Fibroblasts and Squamous Epithelial Cells Constitute a Unique Microenvironment in a Mouse Model of Inflammation-Induced Colon Cancer
Source: PubMed Central journal article supplement (PMC9114773; doi:10.3389/fonc.2022.878920), 2022-05-04
Supplement: Image_4.pdf [file Image_4.pdf]

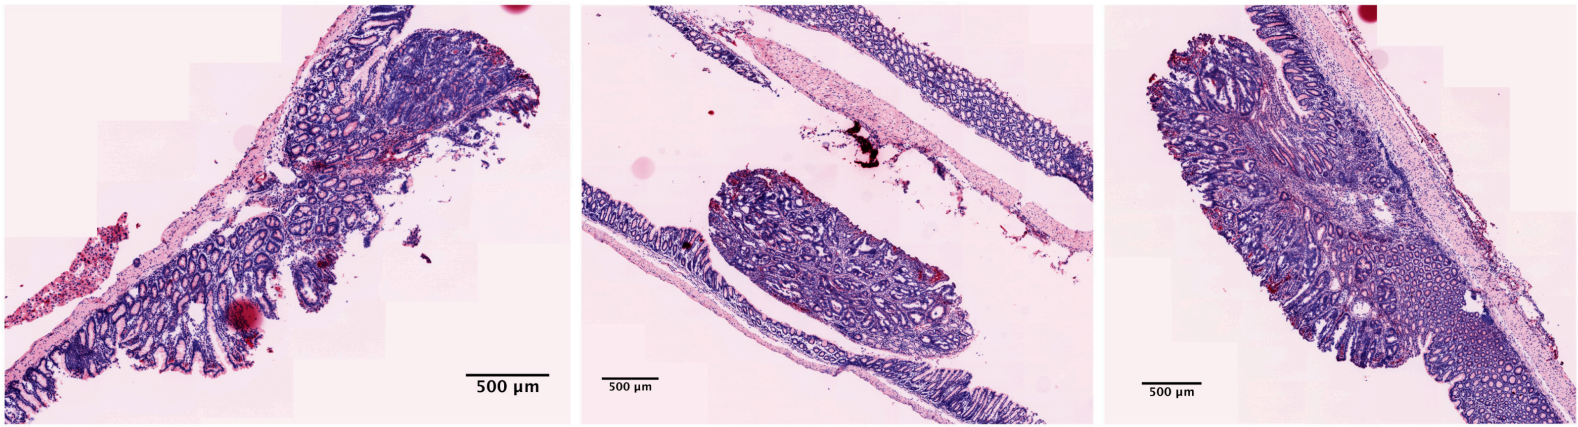

Supplementary Figure S4 | Stitched virtual H&E images of APC tumors.
