# Supplementary material for: Cancer-Associated Fibroblasts and Squamous Epithelial Cells Constitute a Unique Microenvironment in a Mouse Model of Inflammation-Induced Colon Cancer
Source: PubMed Central journal article supplement (PMC9114773; doi:10.3389/fonc.2022.878920), 2022-05-04
Supplement: Image_6.pdf [file Image_6.pdf]

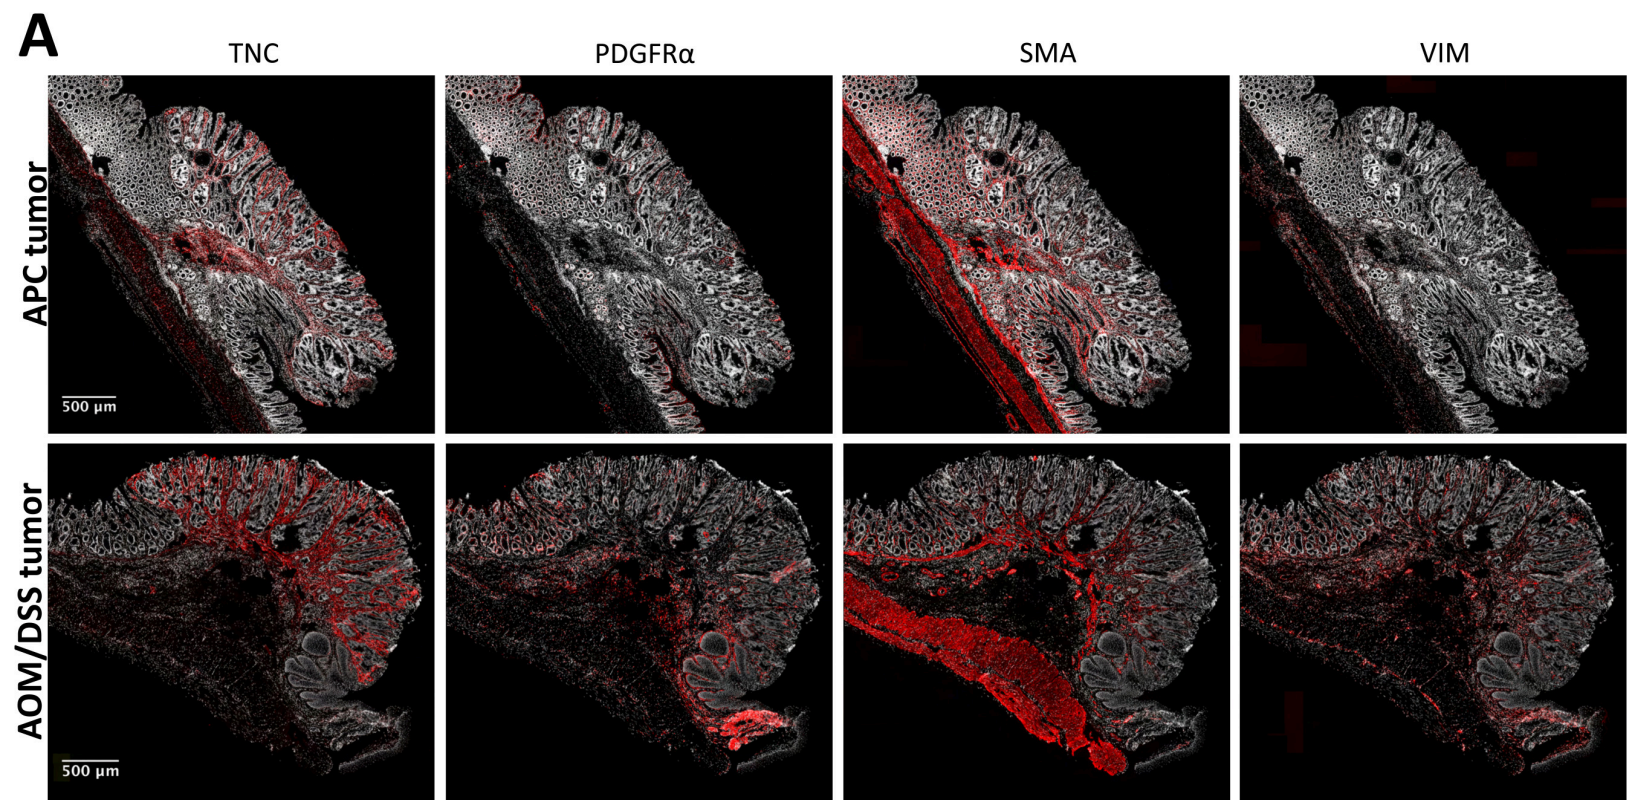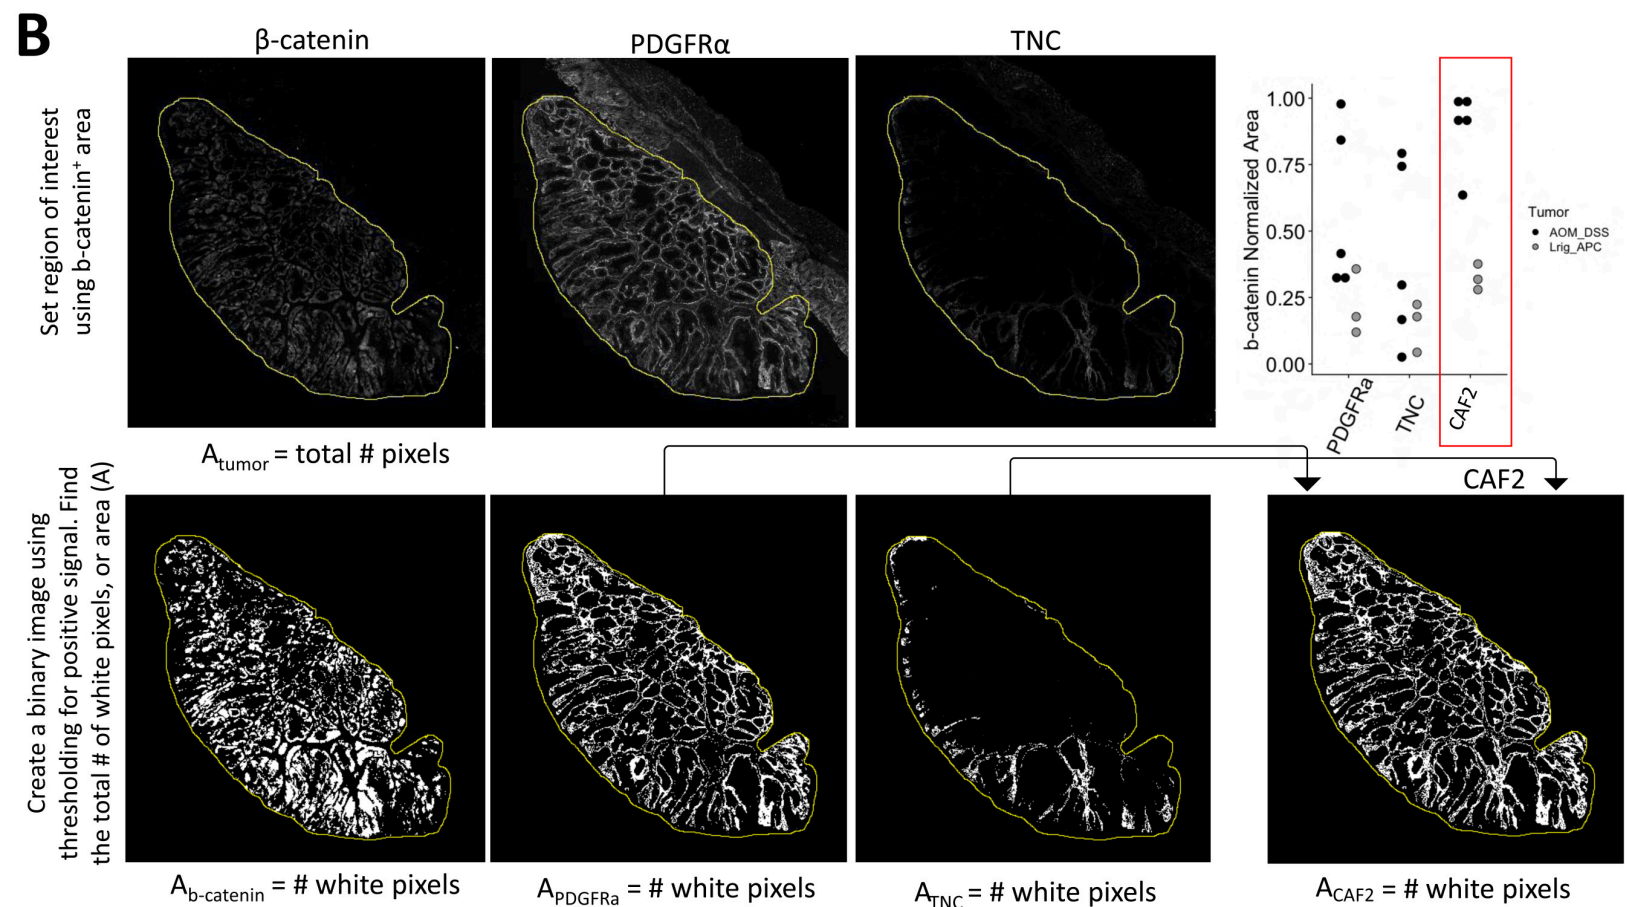

**Supplementary Figure S6 | MxIF CAF markers and quantification method. (A)** Single CAF markers with nuclei counterstain (white) from MxIF images in Figure 3A. **(B)** Workflow for MxIF quantification, using CAF2 quantification as an example.
