# Supplementary material for: Cancer-Associated Fibroblasts and Squamous Epithelial Cells Constitute a Unique Microenvironment in a Mouse Model of Inflammation-Induced Colon Cancer
Source: PubMed Central journal article supplement (PMC9114773; doi:10.3389/fonc.2022.878920), 2022-05-04
Supplement: Image_7.pdf [file Image_7.pdf]

TNC/PDGFR $\alpha$ /SMA/  
VIM/ $\beta$ -catenin/nuclei

CAF1 mask

CAF2 mask

$\beta$ -catenin mask

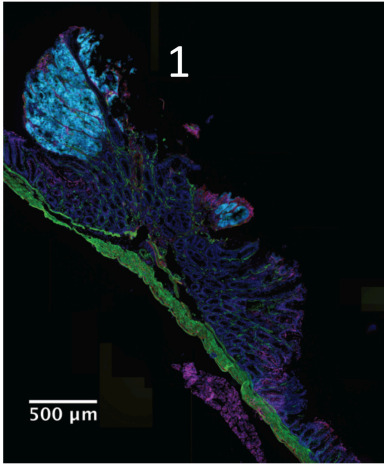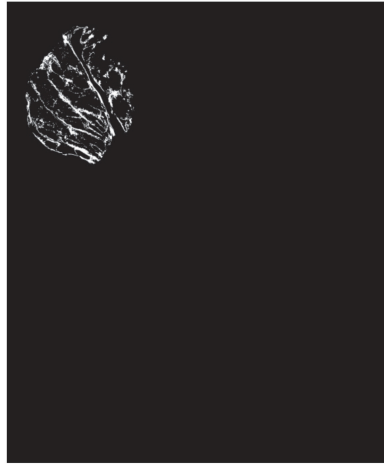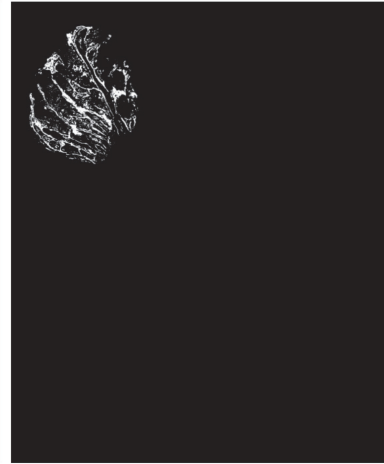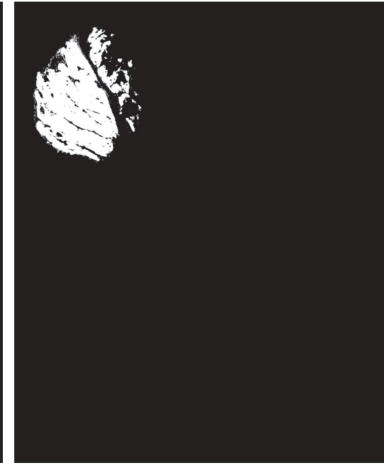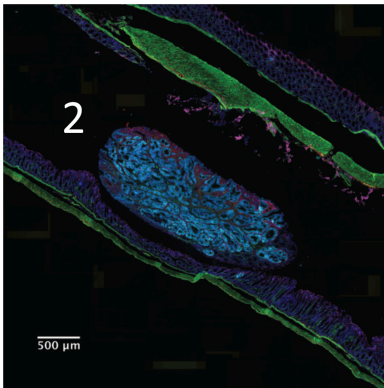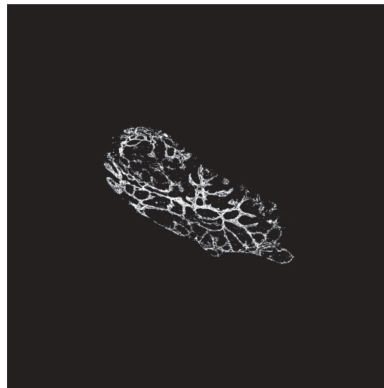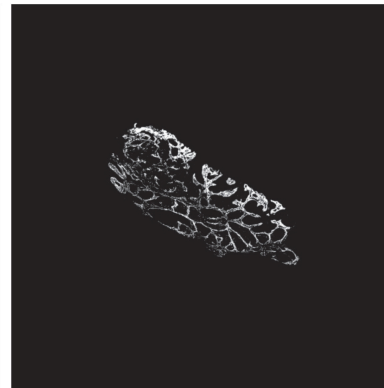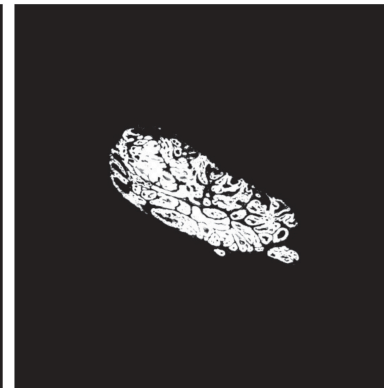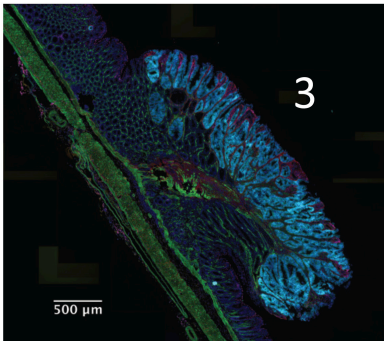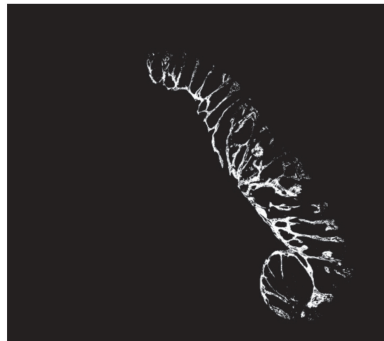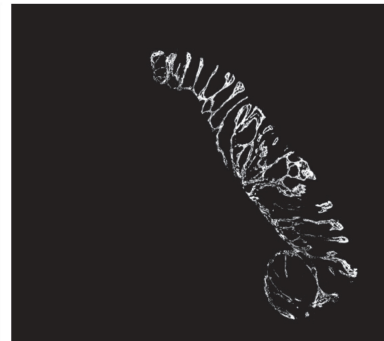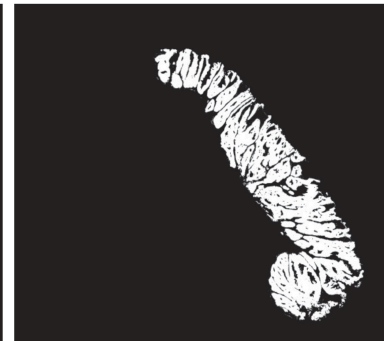

**Supplementary Figure S7** | MxIF images and binary masks used for quantification of APC tumor CAF1 and CAF2 marker expression, normalized by  $\beta$ -catenin-expressing tumor area for n=3 tumors.
