# Supplementary material for: Cancer-Associated Fibroblasts and Squamous Epithelial Cells Constitute a Unique Microenvironment in a Mouse Model of Inflammation-Induced Colon Cancer
Source: PubMed Central journal article supplement (PMC9114773; doi:10.3389/fonc.2022.878920), 2022-05-04
Supplement: Image_10.pdf [file Image_10.pdf]

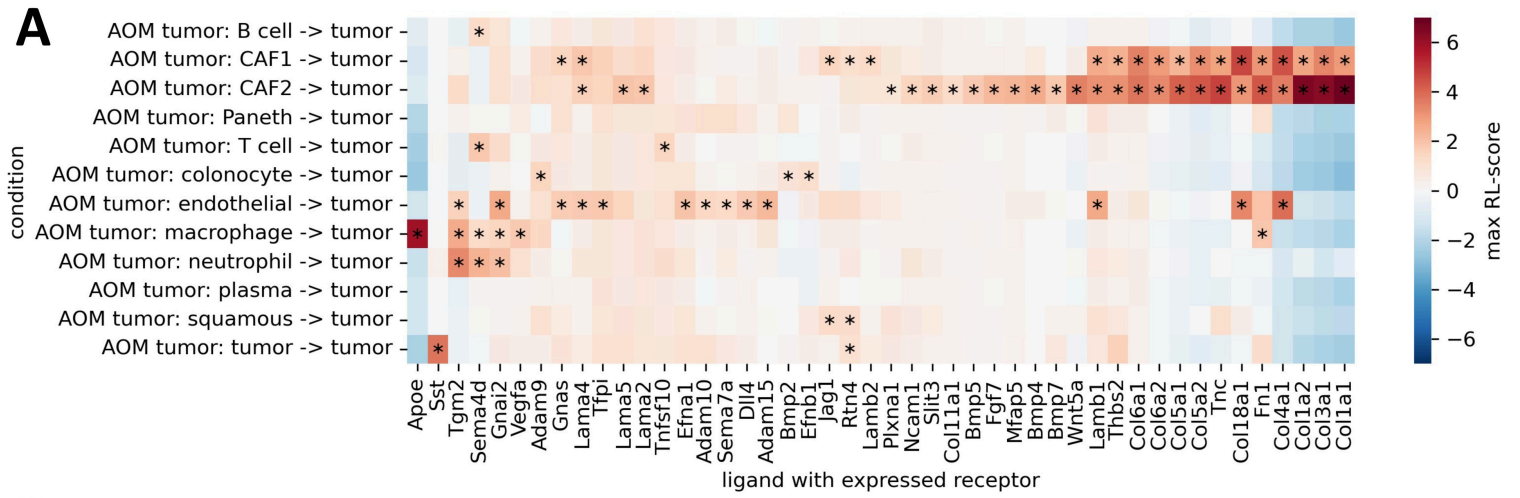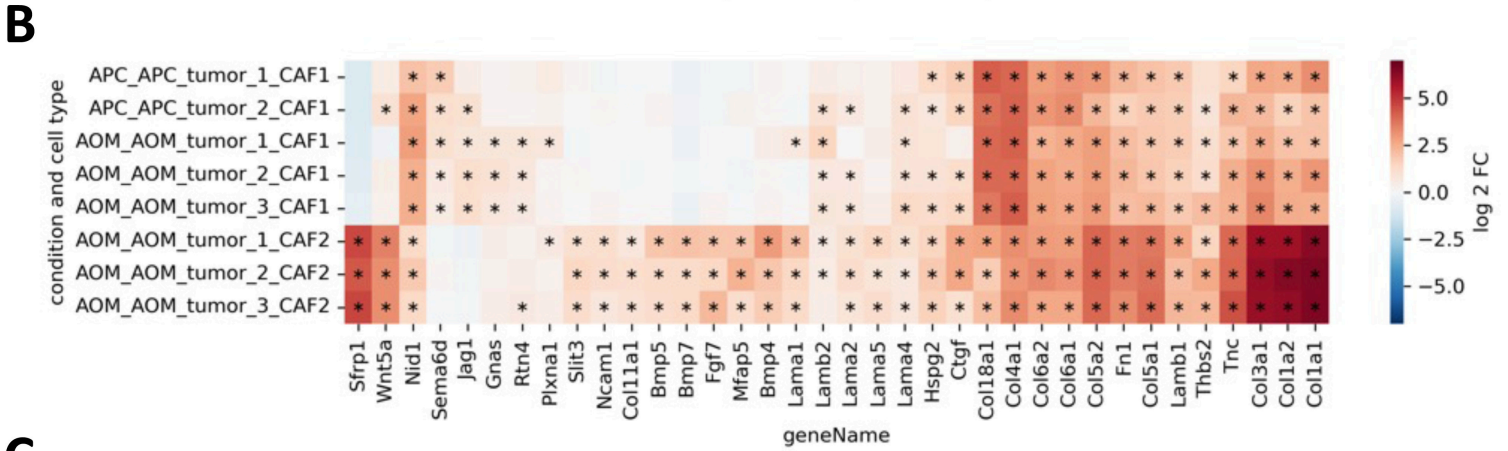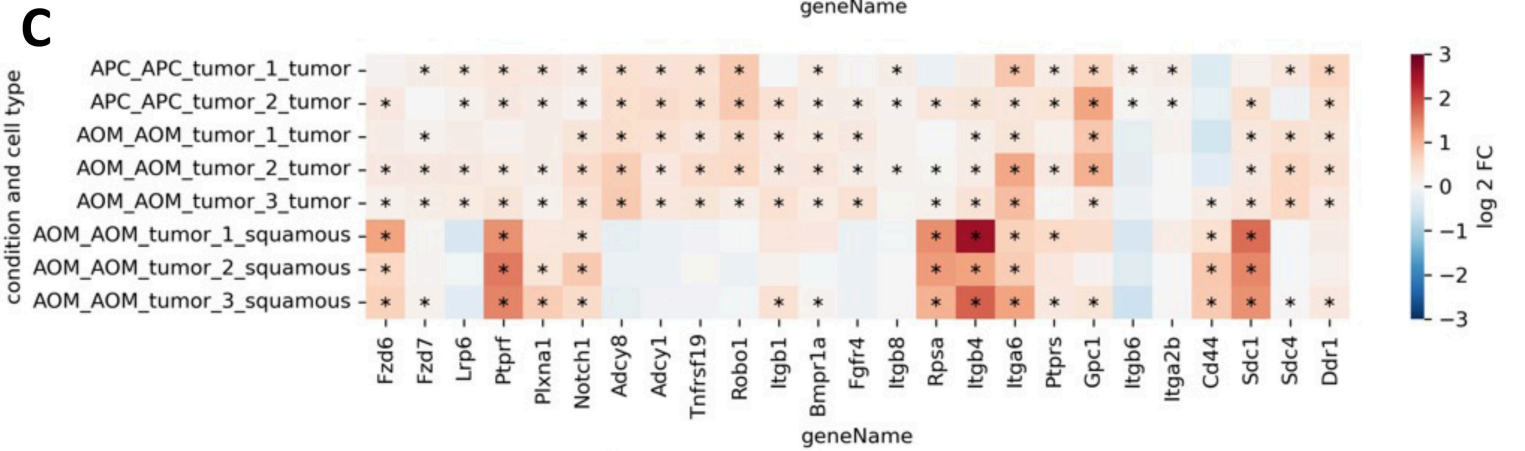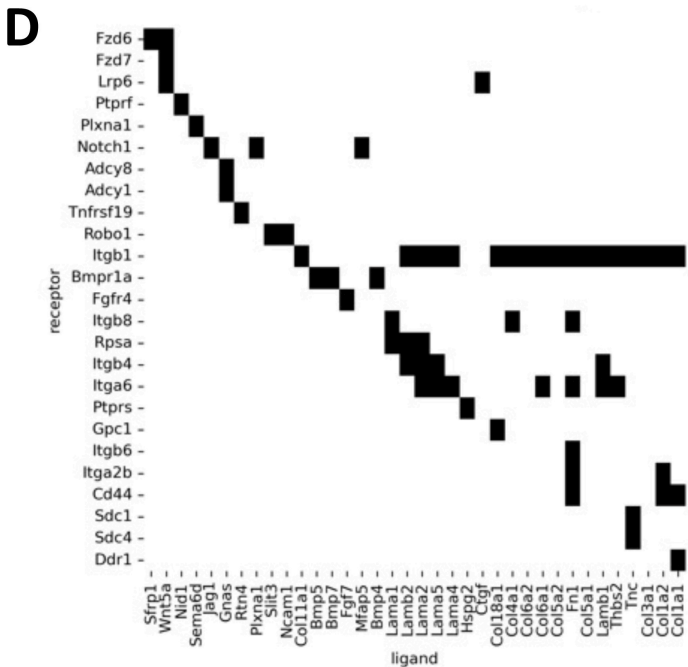

**Supplementary Figure S10 | Differentially expressed ligands and receptors in CAF-tumor interactions. (A)** Differential (AOM/DSS compared to APC) R-L interactions across all cell types in AOM/DSS tumor samples. Ligands from the R-L pairs are displayed, color corresponds to R-L score, and asterisks (\*) indicate significant interactions. **(B)** Differentially expressed ligands in CAF cells with a receptor in squamous, AOM/DSS tumor, or APC tumor cells. Color corresponds to log<sub>2</sub>FC values and asterisks (\*) indicate significant interactions. **(C)** Differentially expressed receptors in squamous, AOM/DSS tumor, or APC tumor cells with a corresponding ligand in CAF1 or CAF2. Color corresponds to log<sub>2</sub>FC values and asterisks (\*) indicate significant interactions. **(D)** Prior knowledge of receptor ligands that can interact.
